# Supplementary material for: Synthesis and Herbicidal Activity Against Buffelgrass (Cenchrus ciliaris) of (±)-3-deoxyradicinin
Source: MDPI journal article supplement (doi:10.3390/molecules24173193), 2019-09-03

# Supporting Information

## Synthesis and herbicidal activity against buffelgrass (*Cenchrus ciliaris*) of (±)-3-deoxyradicinin

Giulia Marsico<sup>1</sup>, Maria Sabrina Ciccone<sup>1</sup>, Marco Masi<sup>2</sup>, Fabrizio Freda<sup>3</sup>,  
Massimo Cristofaro<sup>3,4</sup>, Antonio Evidente<sup>2</sup>, Stefano Superchi<sup>1,\*</sup>, and Patrizia Scafato<sup>1,\*</sup>

<sup>1</sup> *Department of Sciences, University of Basilicata, Via dell'Ateneo Lucano 10, 85100 Potenza, Italy;*

<sup>2</sup> *Department of Chemical Sciences, University of Naples Federico II, Complesso Universitario Monte S. Angelo, Via Cintia 4, 80126 Napoli, Italy;*

<sup>3</sup> *BBCA onlus, Via A. Signorelli 105, 00123 Rome, Italy;*

<sup>4</sup> *ENEA C.R. Casaccia, SSPT-BIOAG-PROBIO, Via Anguillarese 301, 00123 Rome, Italy.*

Figure S1. <sup>1</sup>HNMR spectrum of compound 4

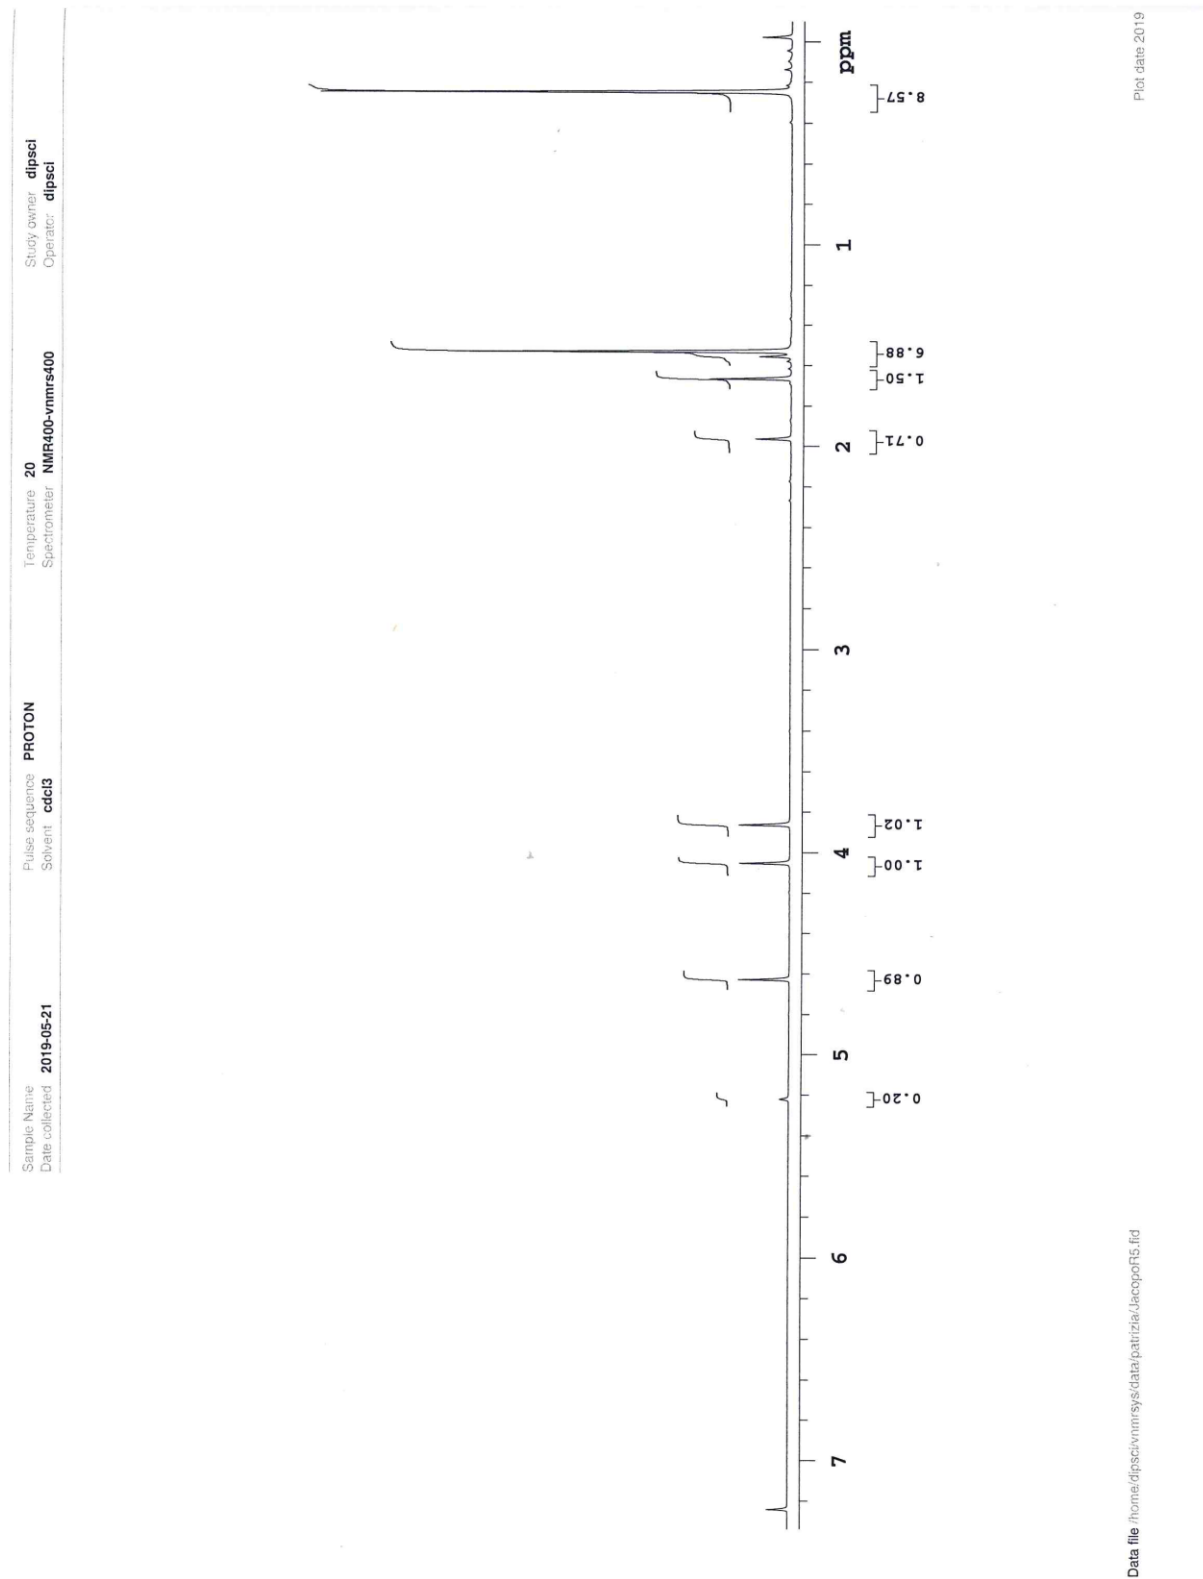

**Figure S2.**  $^{13}\text{C}$ NMR spectrum of compound **4**

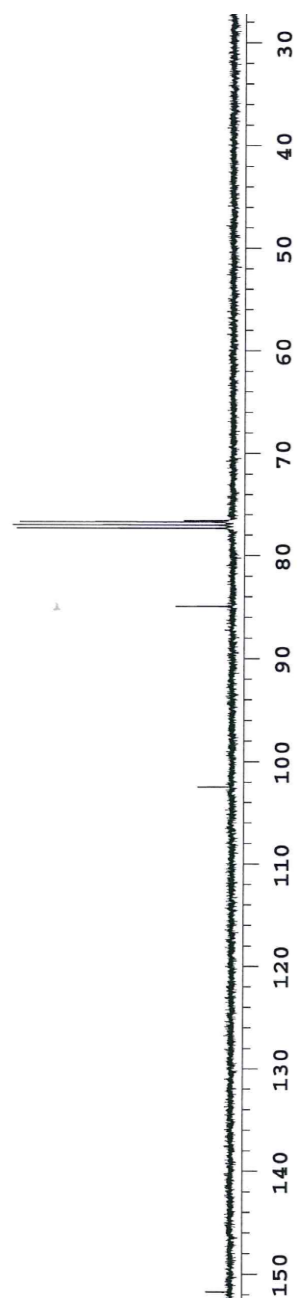

**Figure S3.**  $^1\text{H}$ NMR spectrum of compound **5a**

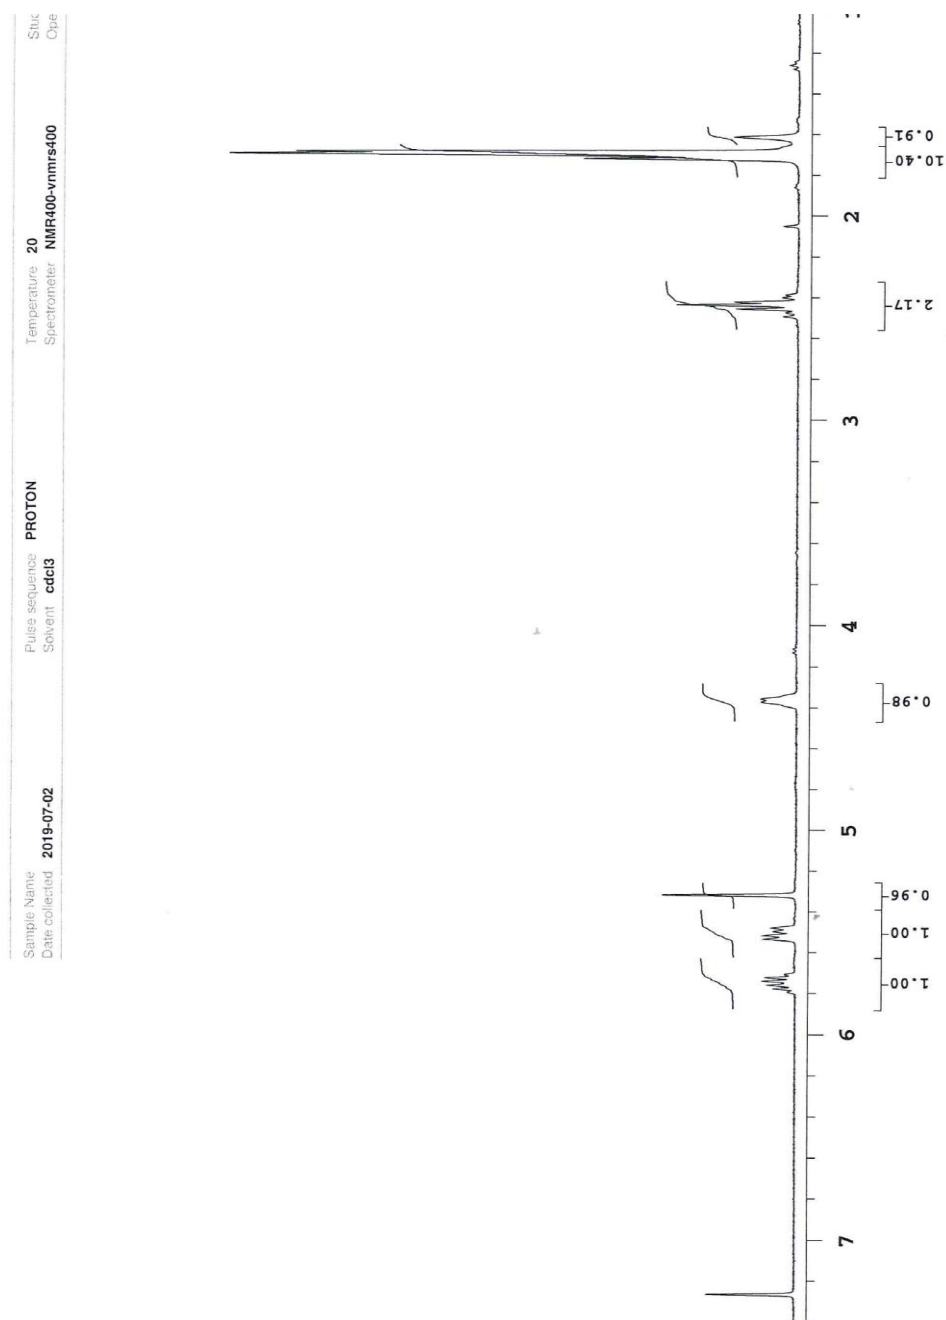

**Figure S4.**  $^{13}\text{C}$ NMR spectrum of compound **5a**

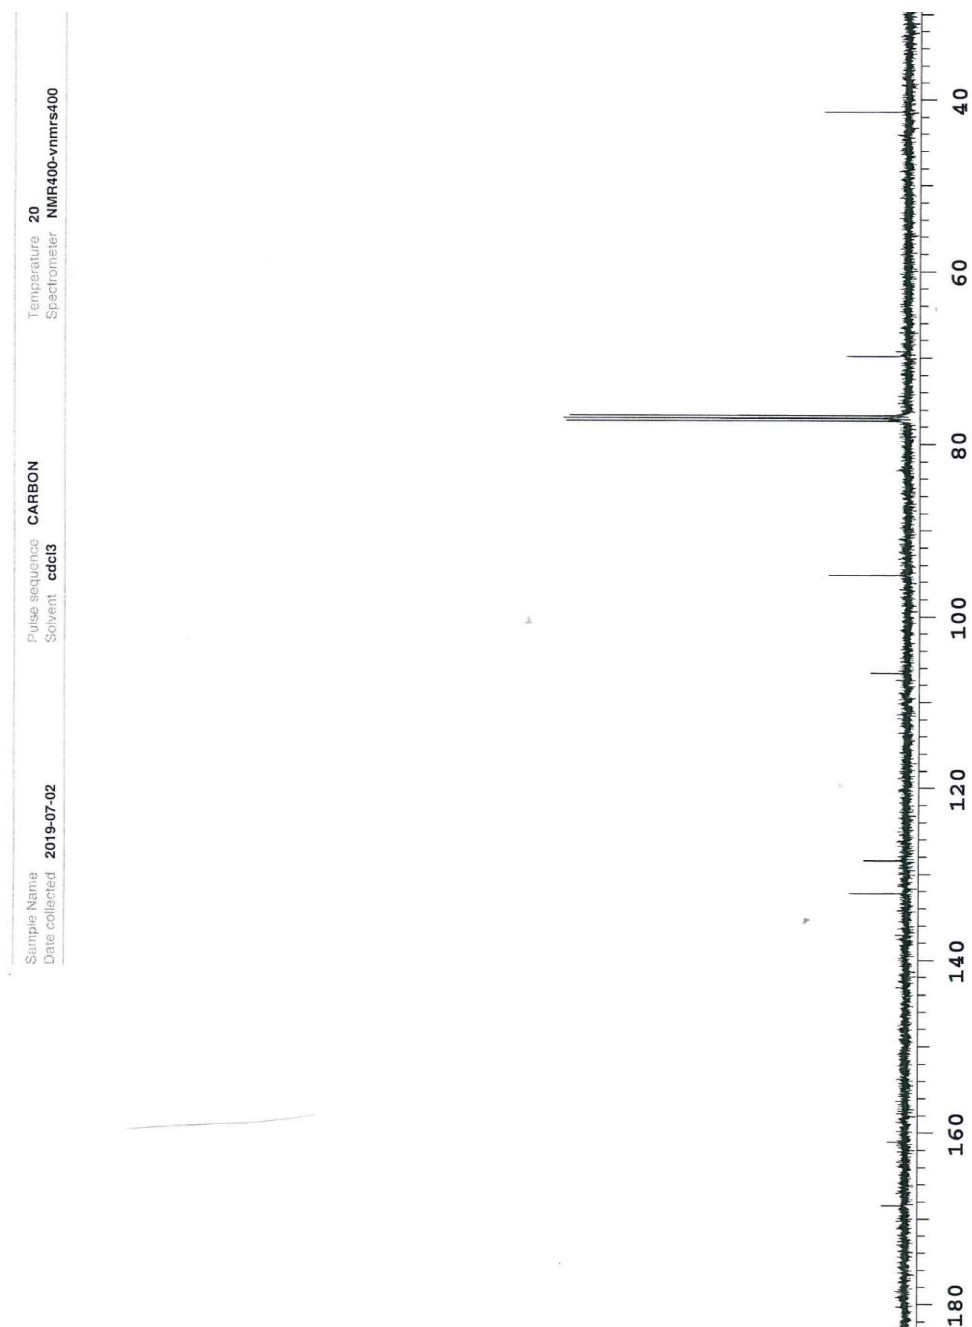

**Figure S5.**  $^1\text{H}$ NMR spectrum of compound **6a**

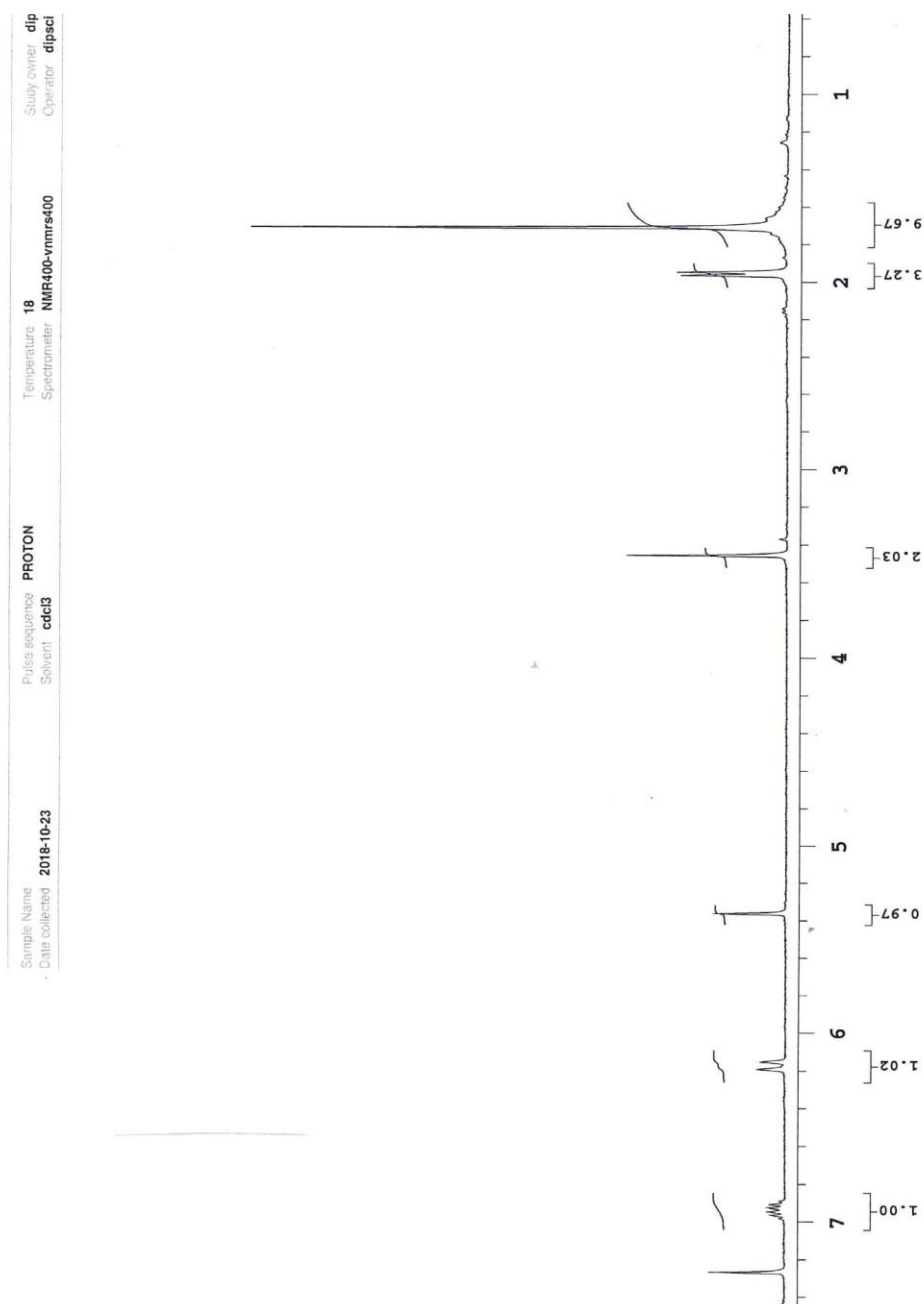

**Figure S6.**  $^{13}\text{C}$ NMR spectrum of compound **6a**

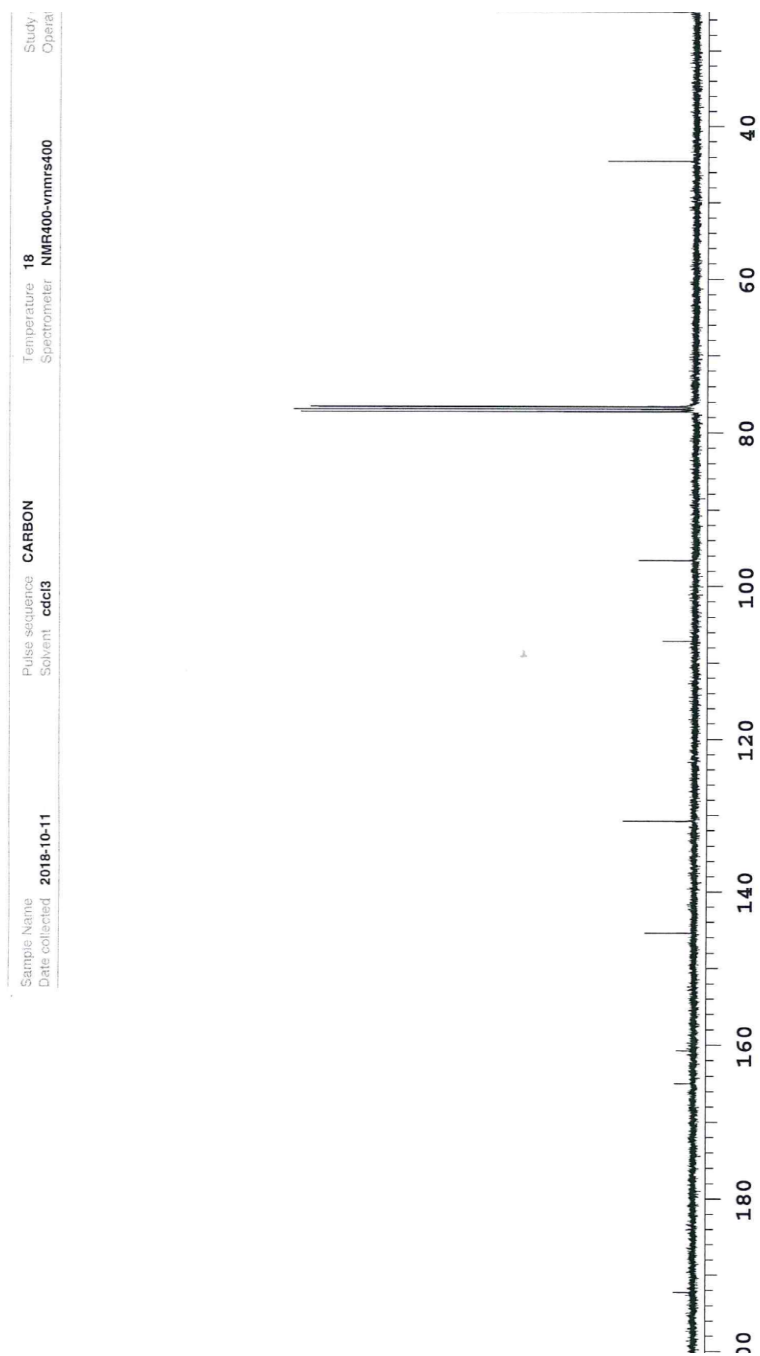

**Figure S7.**  $^1\text{H}$ NMR spectrum of compound **7a**

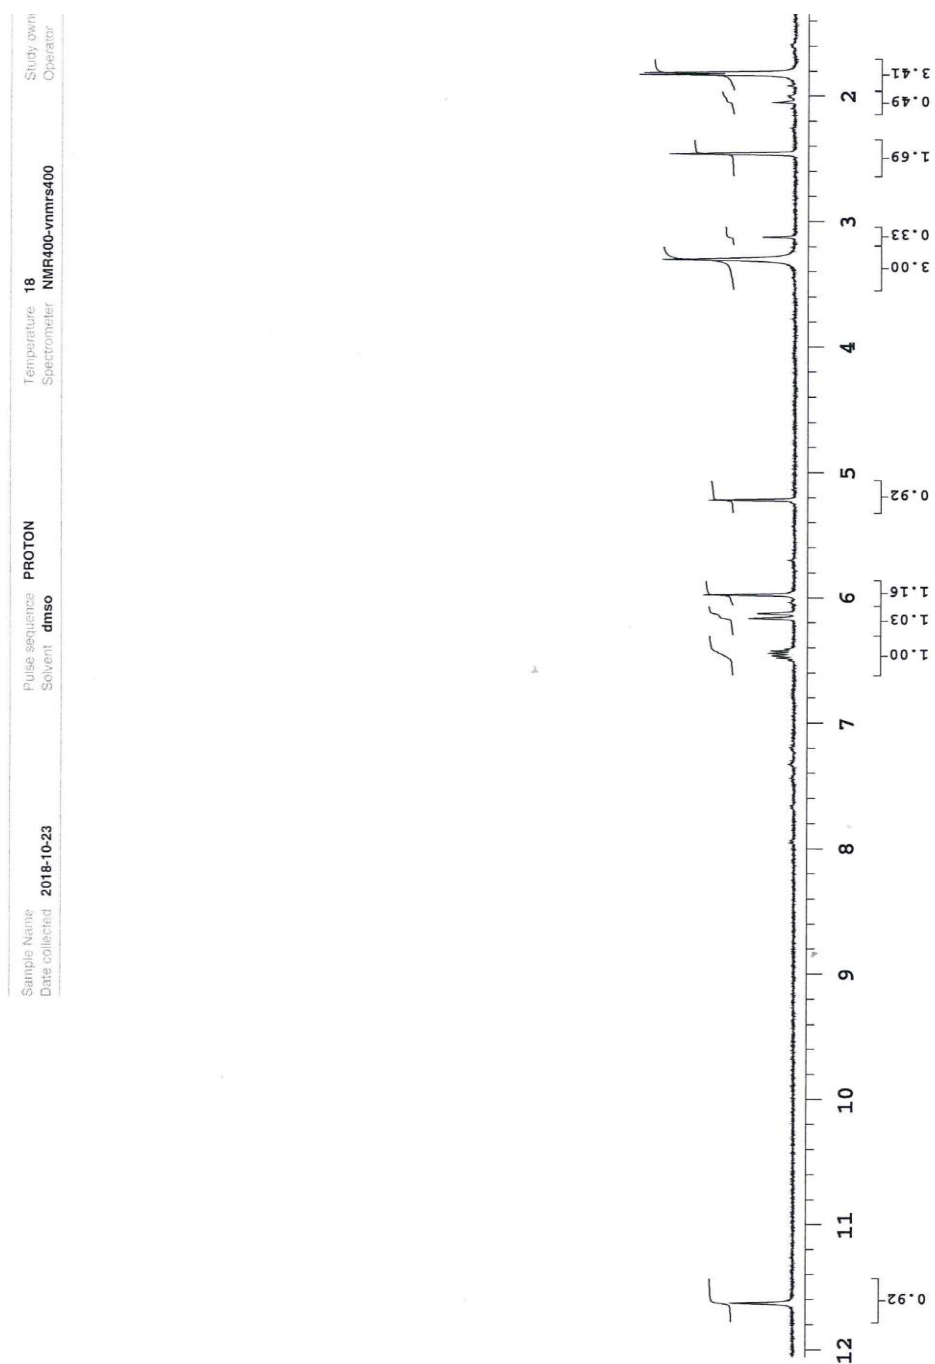



**Figure S8.**  $^{13}\text{C}$ NMR spectrum of compound **7a**

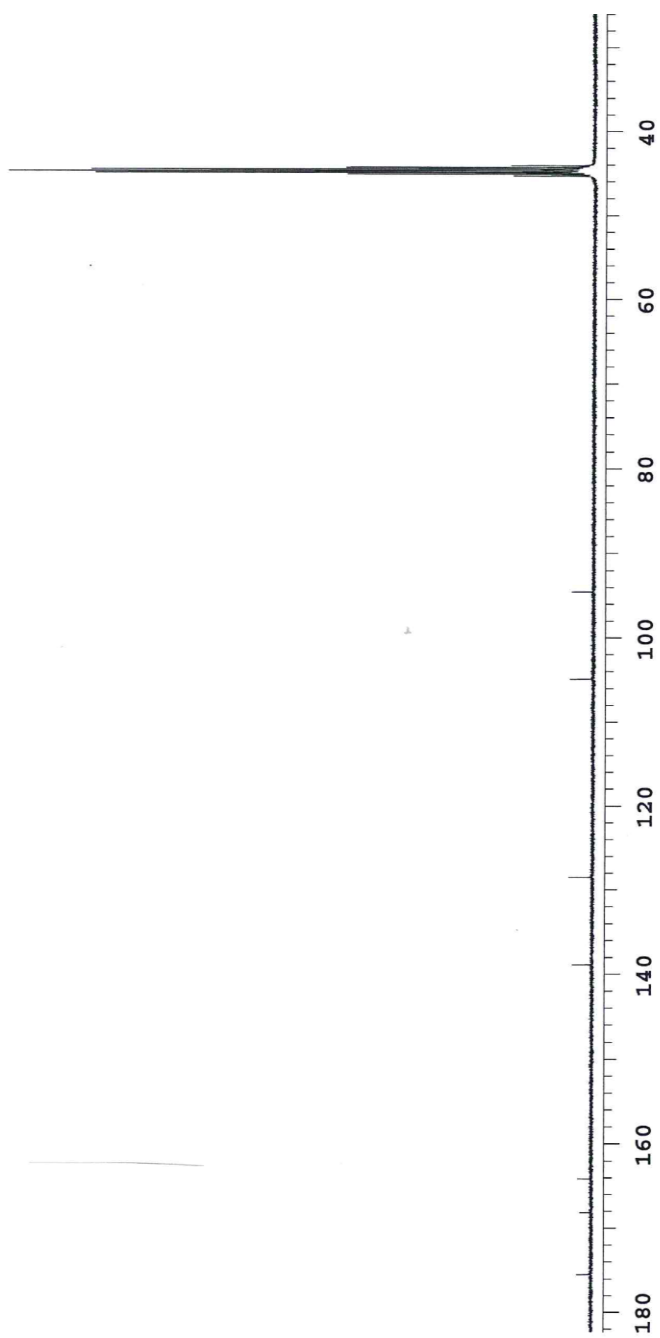

**Figure S9.**  $^1\text{H}$ NMR spectrum of compound **2**

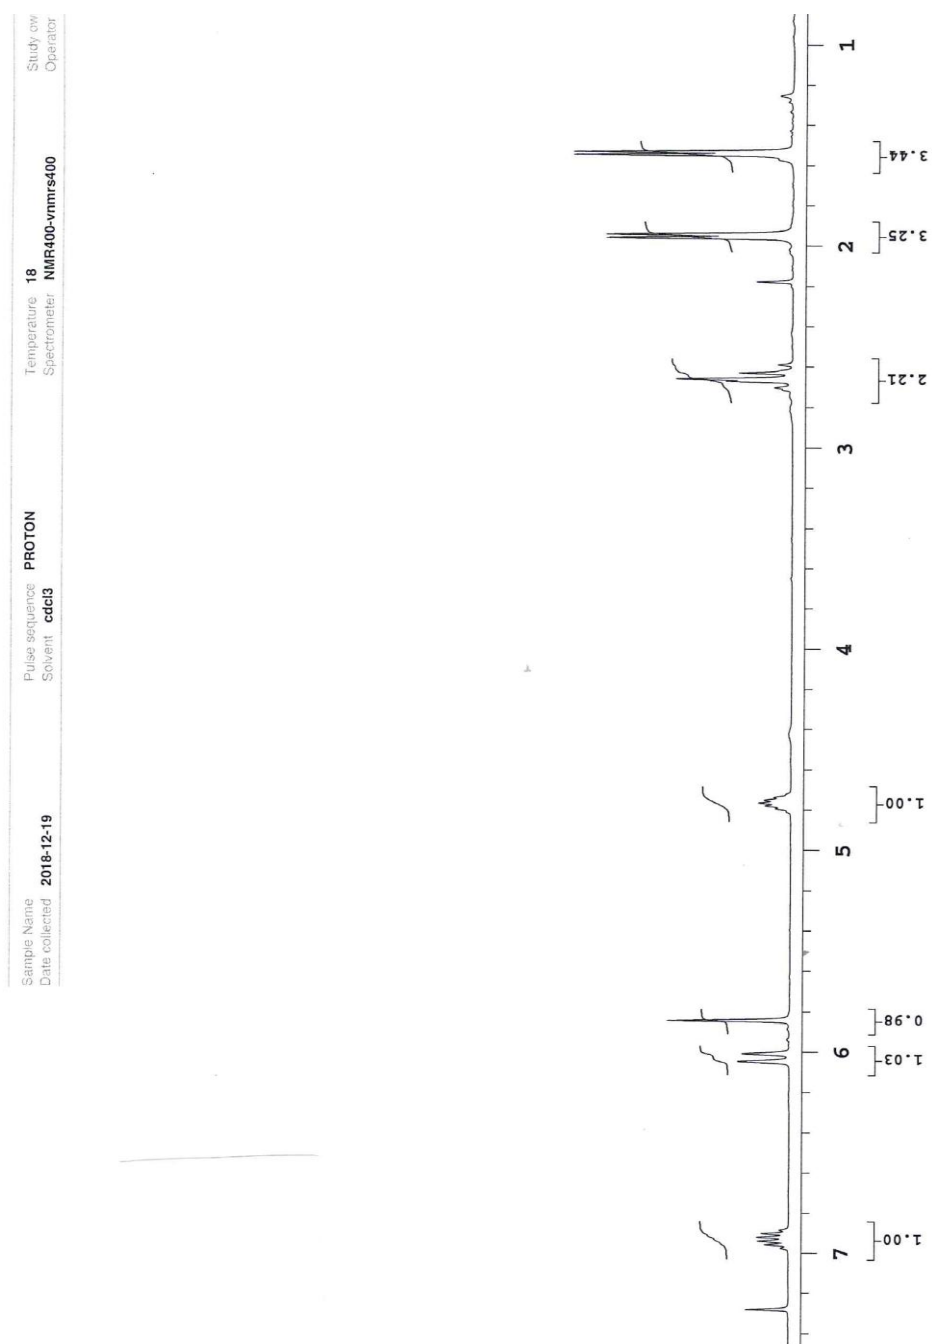

**Figure S10.**  $^{13}\text{C}$ NMR spectrum of compound **2**

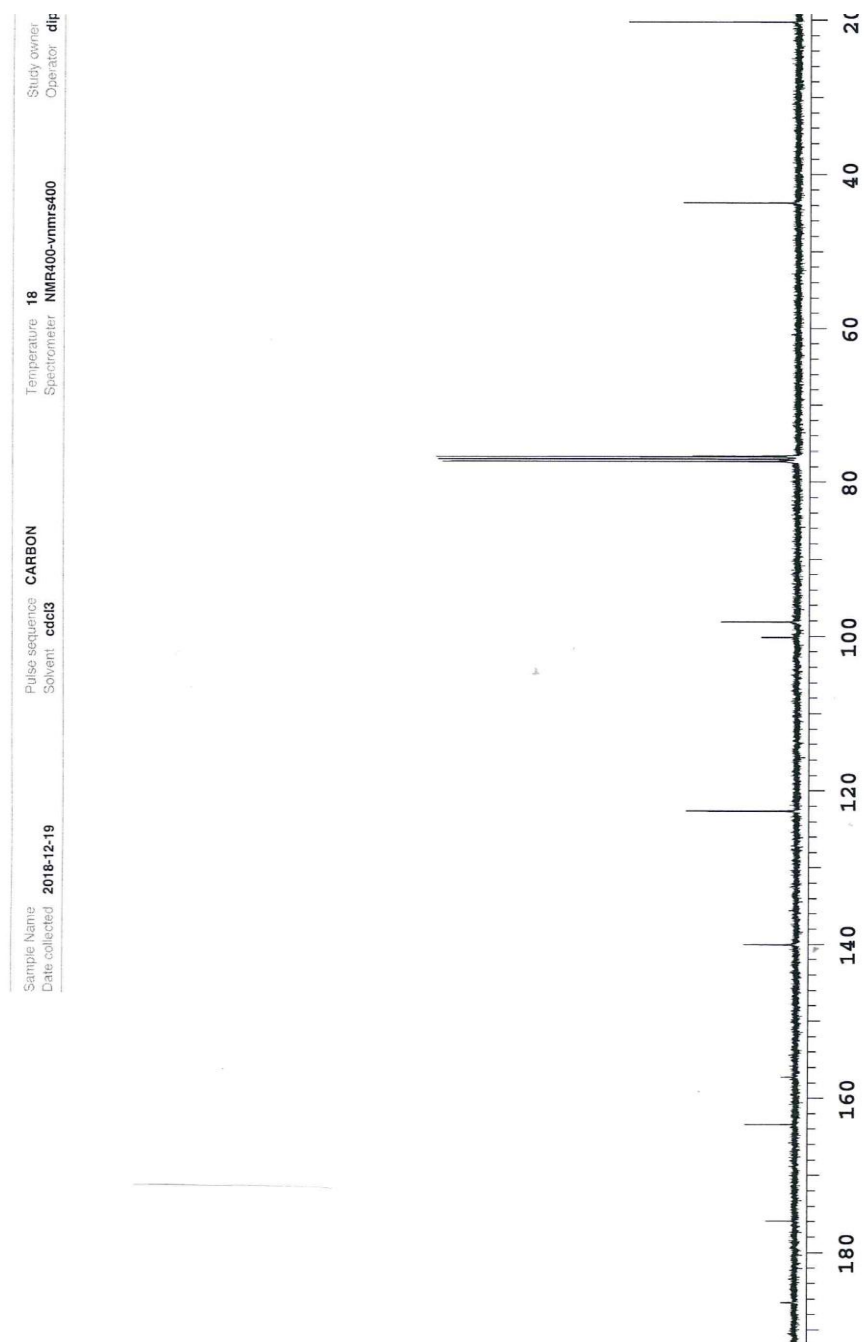

**Figure S11.**  $^1\text{H}$ NMR spectrum of compound **9a/9b**

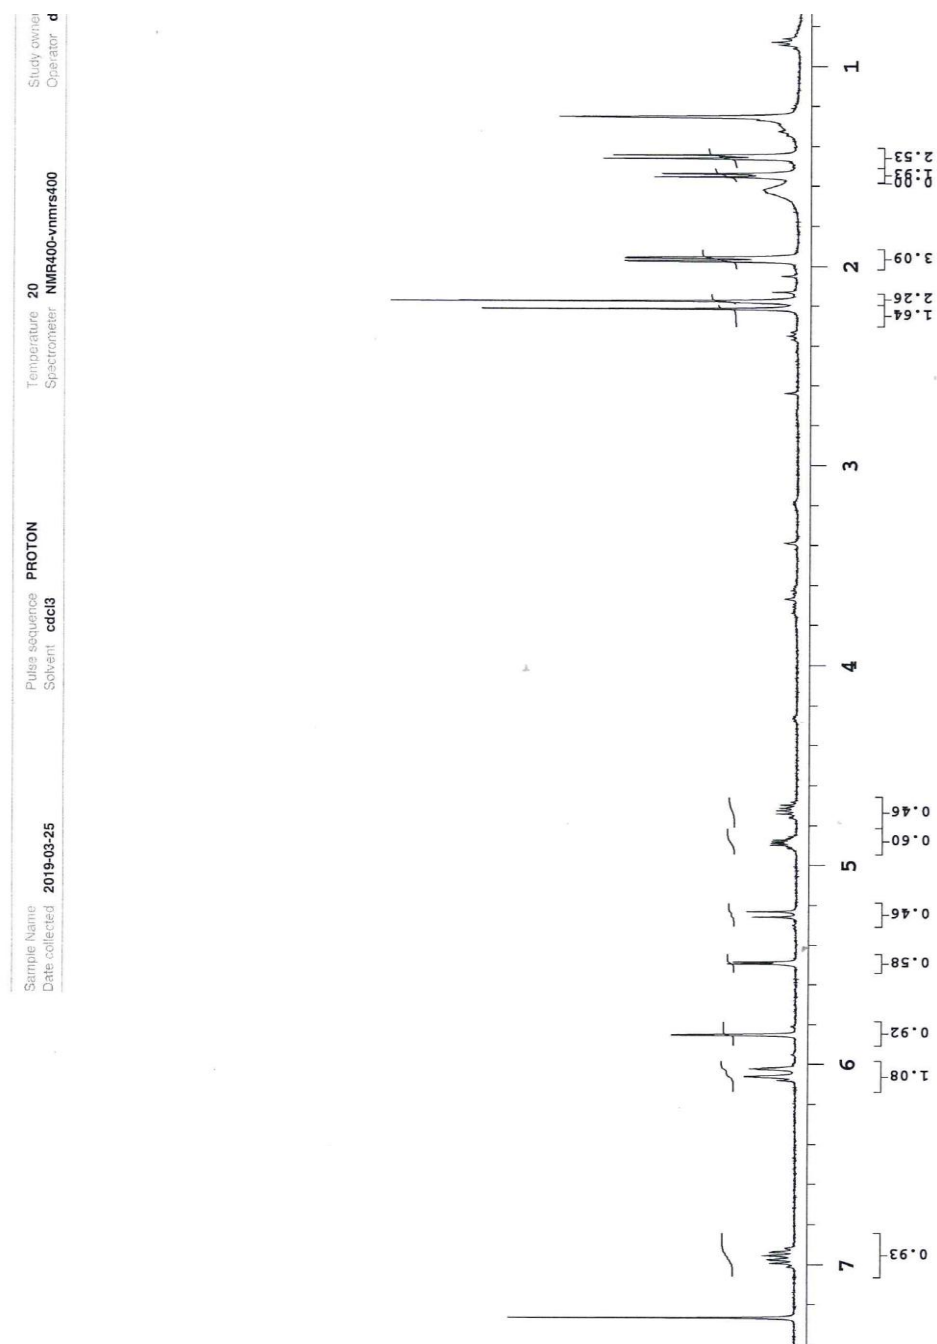

Figure S12. <sup>1</sup>HNMR spectrum of compound 10

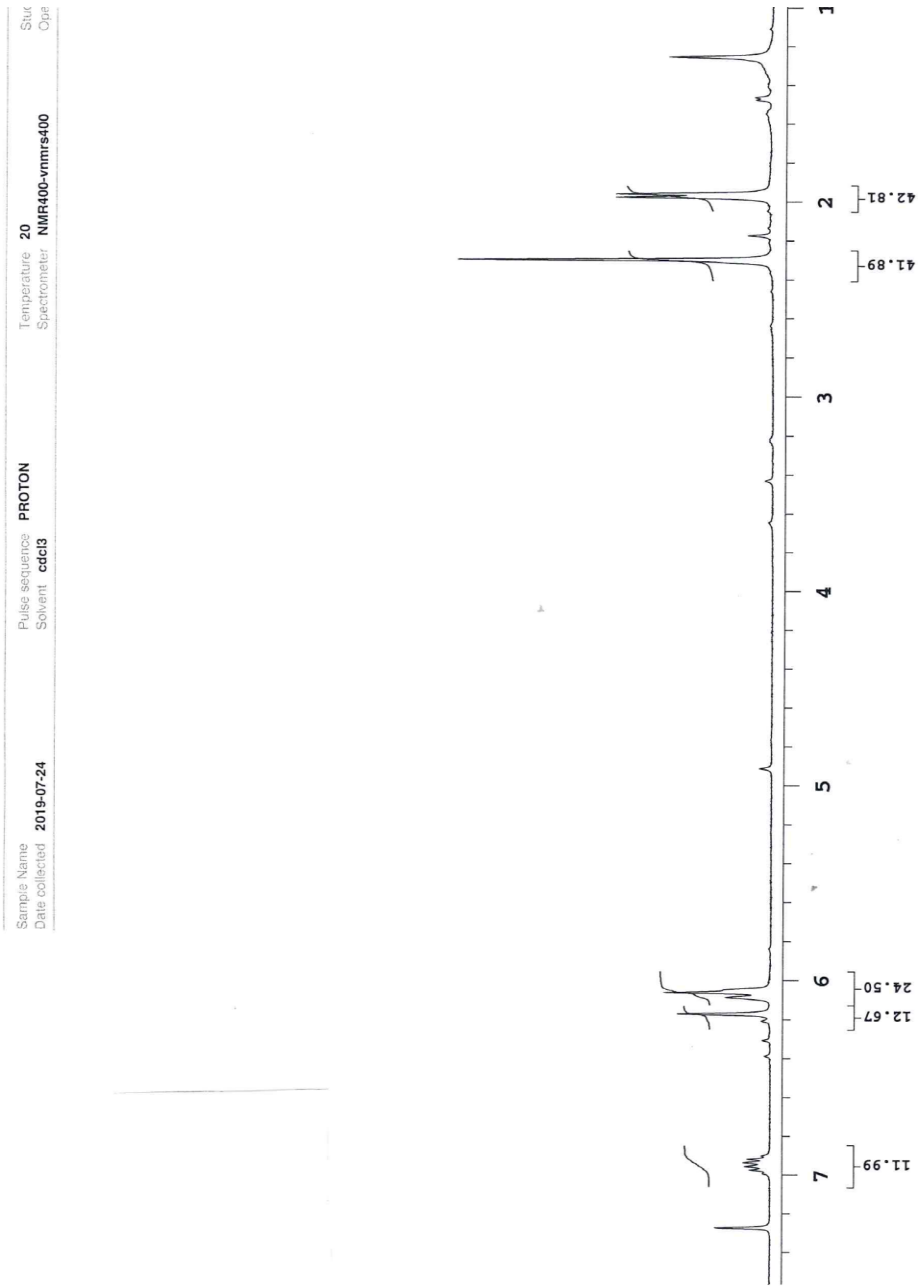

**Figure S13.**  $^{13}\text{C}$ NMR spectrum of compound **10**

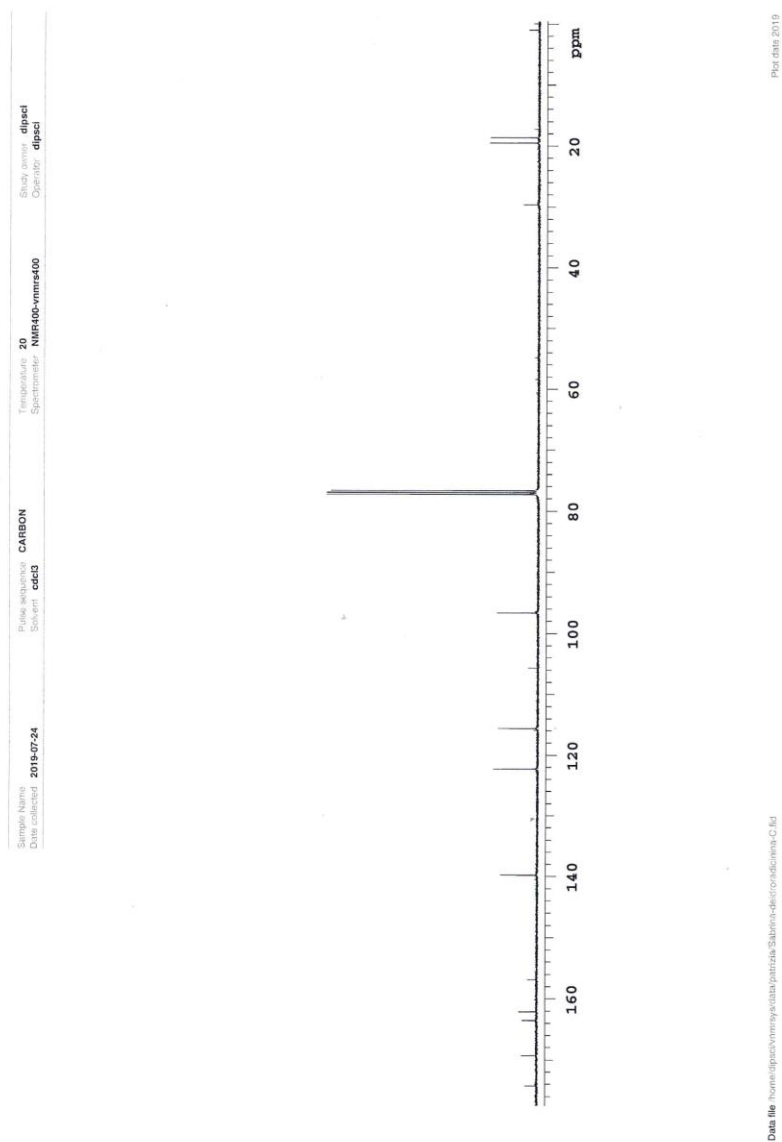

**Figure S14.**  $^1\text{H}$ NMR spectrum of compound **5b**

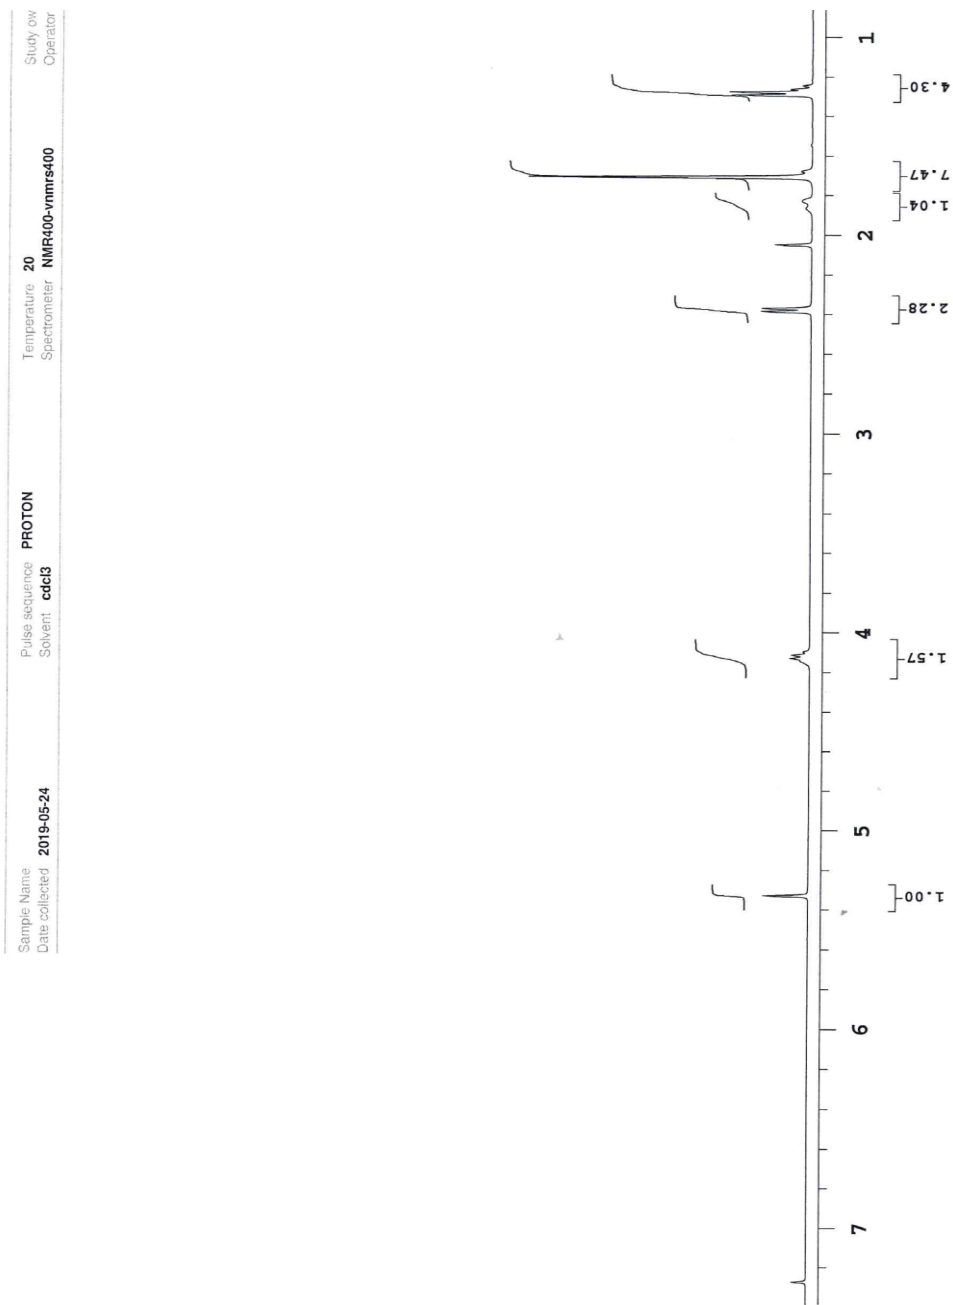

**Figure S15.**  $^{13}\text{C}$ NMR spectrum of compound **5b**

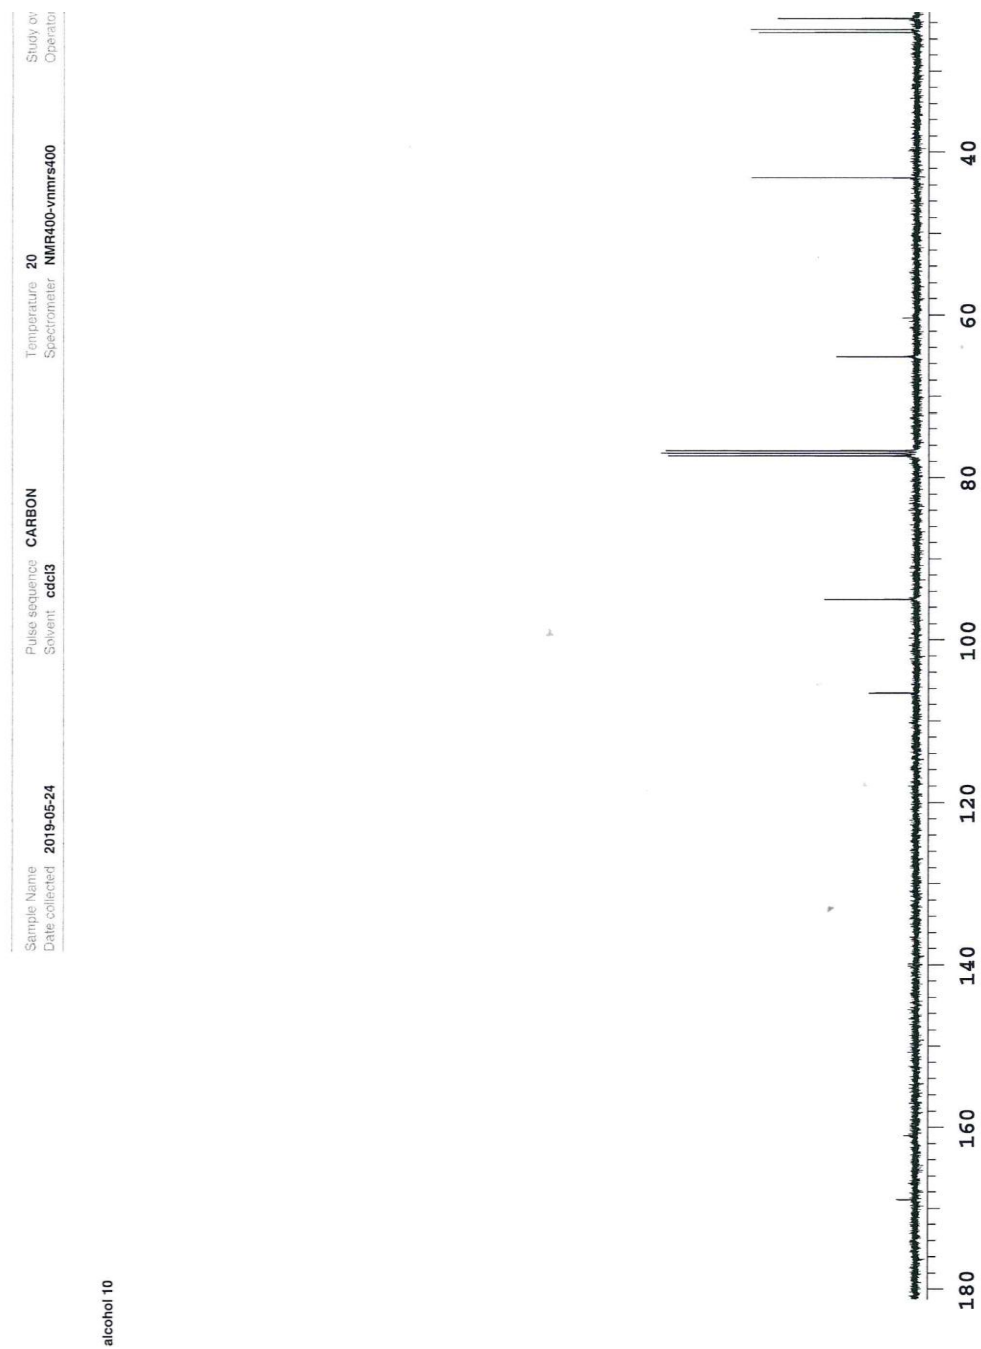



**Figure S16.**  $^1\text{H}$ NMR spectrum of compound **6b**

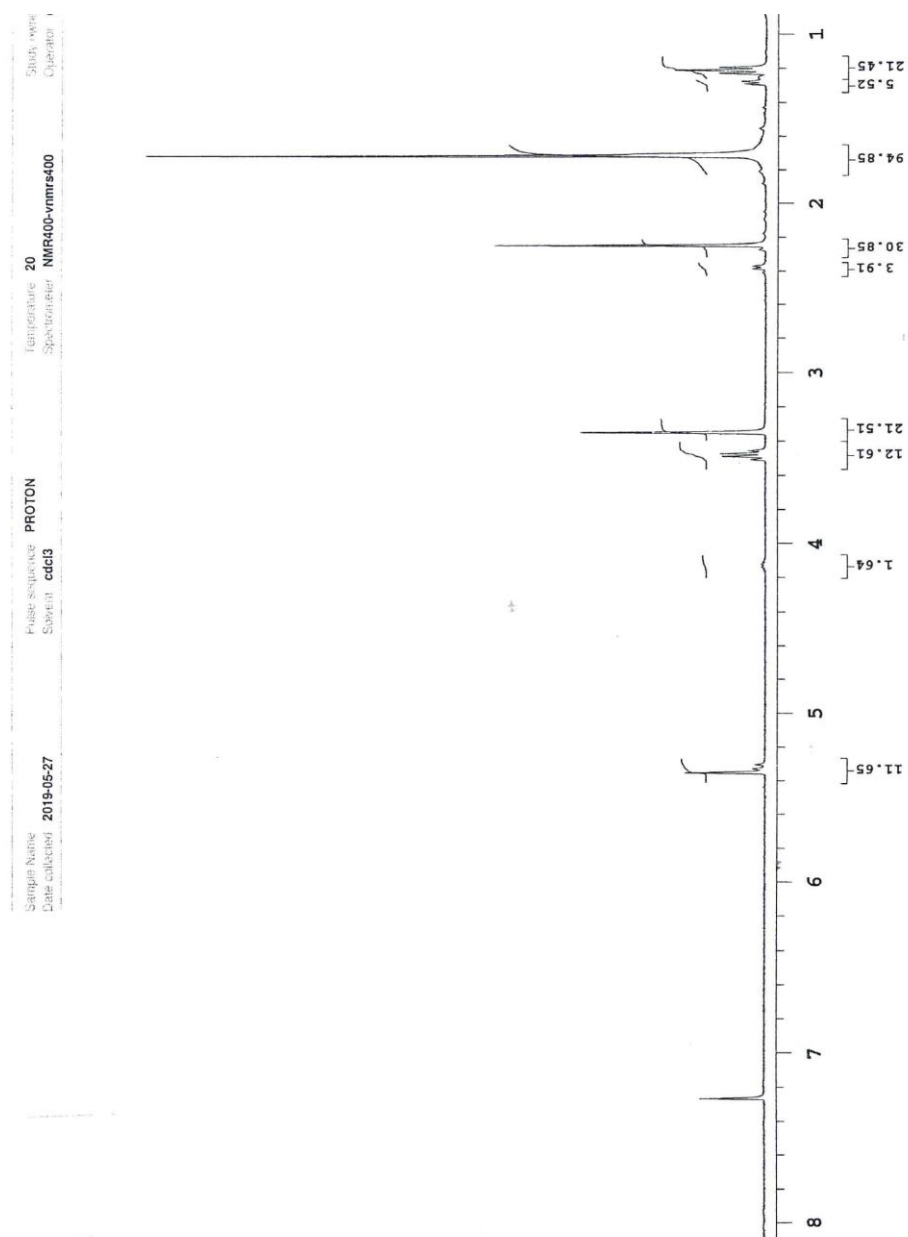

**Figure S17.**  $^{13}\text{C}$ NMR spectrum of compound **6b**

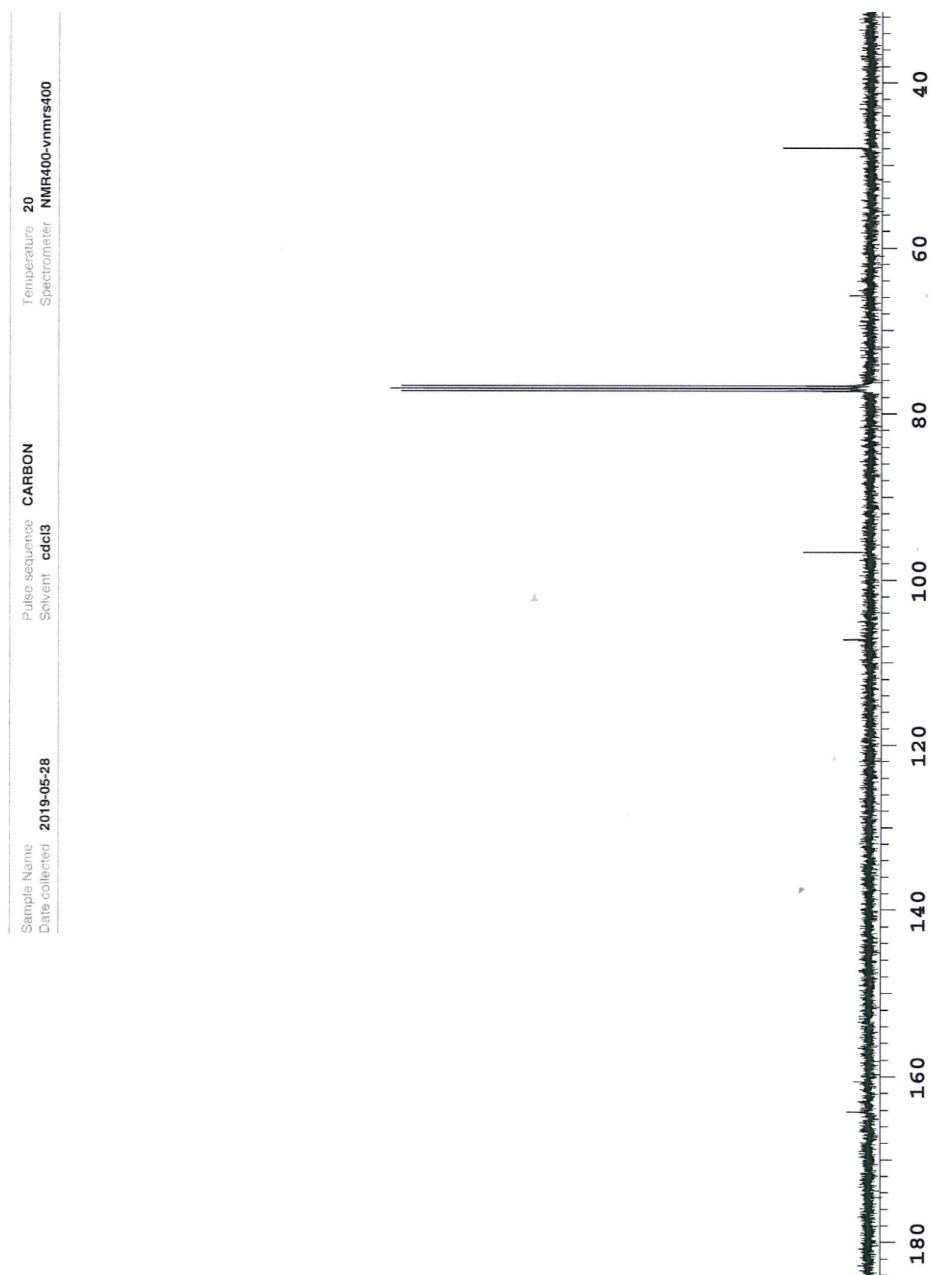

**Figure S18.**  $^1\text{H}$ NMR spectrum of compound **7b**

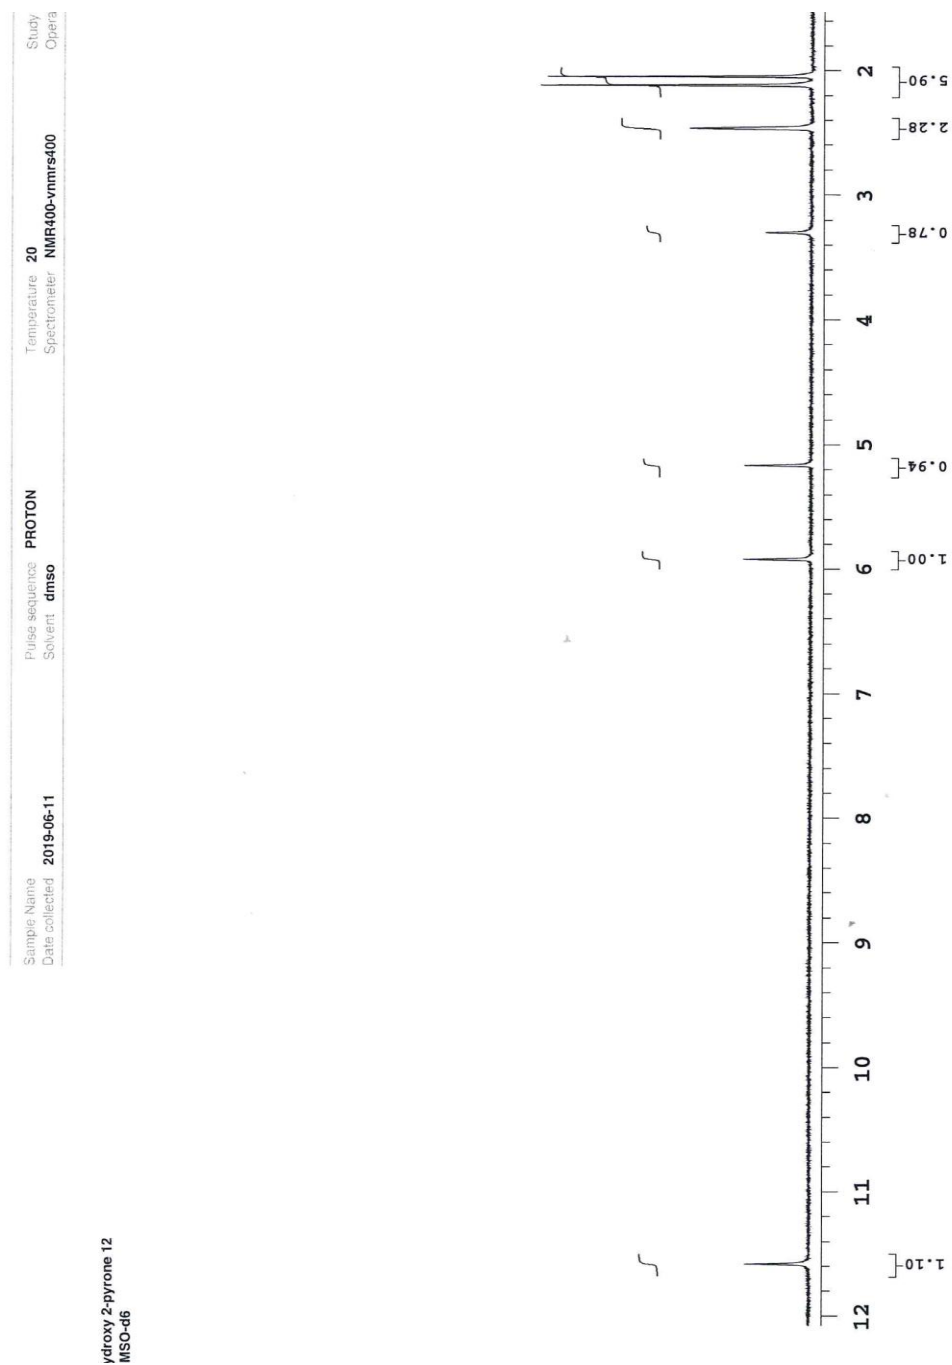

**Figure S19.**  $^{13}\text{C}$ NMR spectrum of compound **7b**

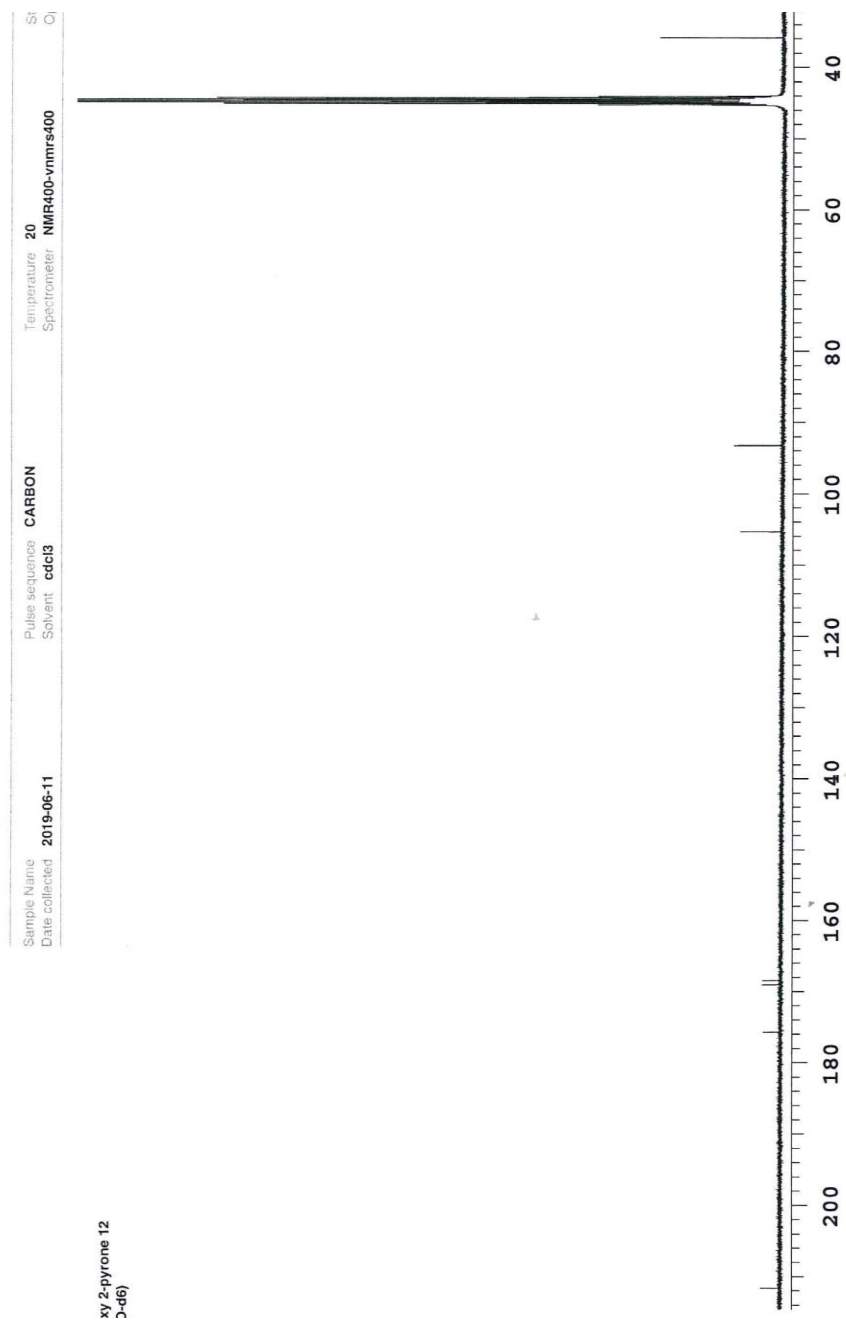

**Figure S20.**  $^1\text{H}$ NMR spectrum of compound ( $\pm$ )-**8**

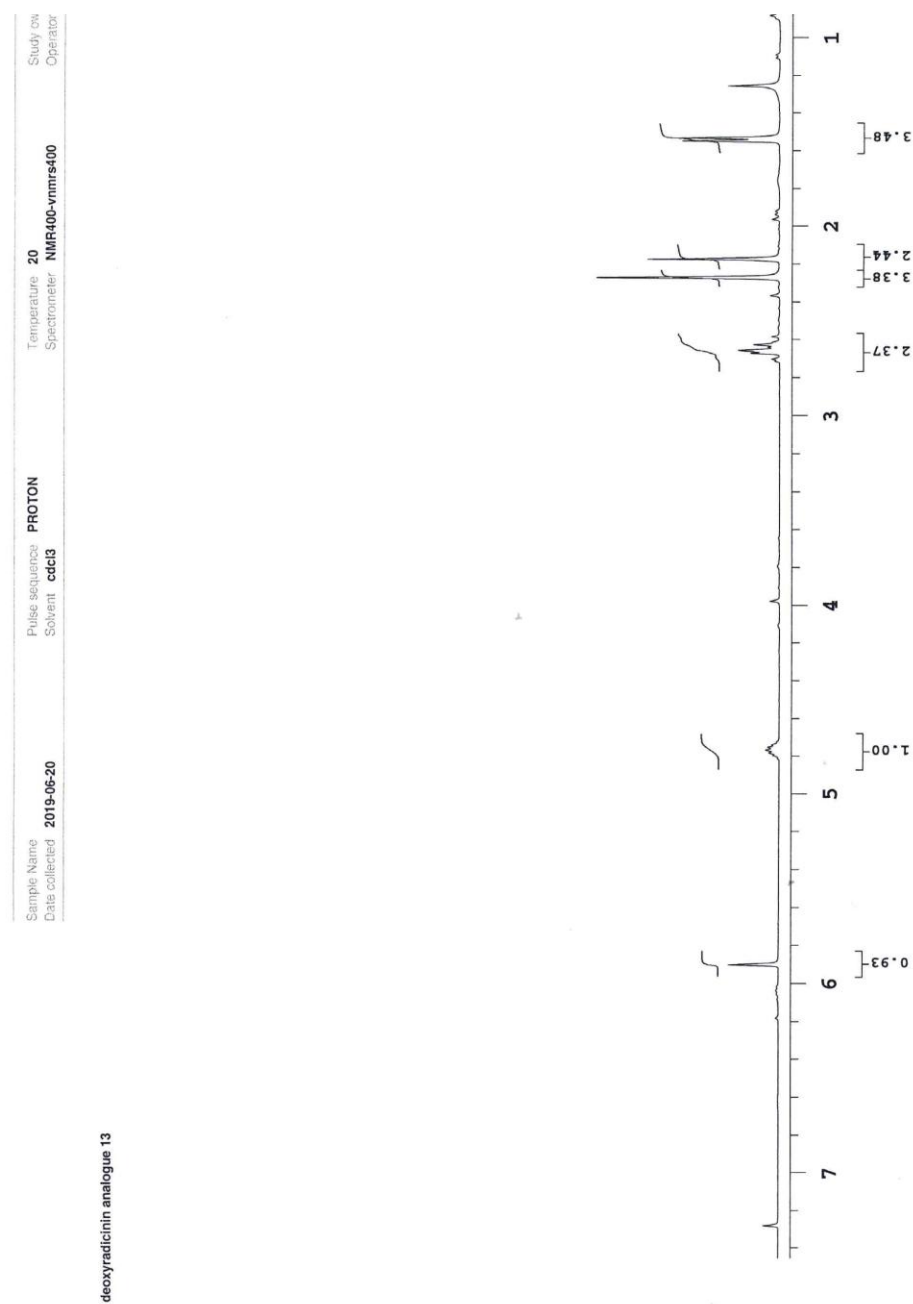

**Figure S21.**  $^{13}\text{C}$ NMR spectrum of compound ( $\pm$ )-8

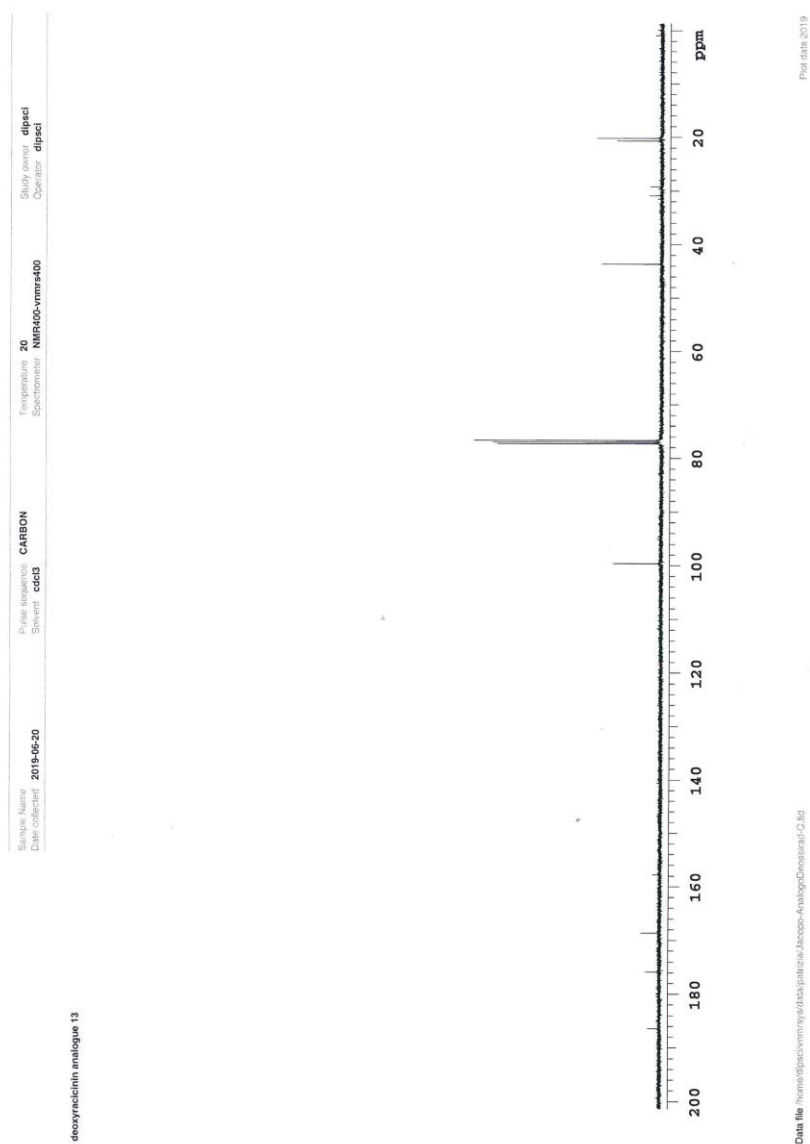

Supplement: s1 [file s1]
